1 Title:

2 A 50-year series of mark-recapture data of large-sized brown trout (*Salmo trutta*) from Lake

3 Mjøsa, Norway

4

5 Authors:

6 S. Jannicke Moe<sup>1</sup>, Chloé R. Nater<sup>2</sup>, Atle Rustadbakken<sup>3</sup>, L. Asbjørn Vøllestad<sup>2</sup>, Espen Lund<sup>1</sup>,

7 Tore Qvenild<sup>3</sup>, Ola Hegge<sup>3</sup>, Per Aass<sup>4</sup>

8

9

10 1) Norwegian Institute for Water Research (NIVA), Gaustadalléen 21, 0349 Oslo, Norway

11 2) Centre for Ecological and Evolutionary Synthesis (CEES), Department of Biology,

12 University of Oslo, P. O. Box 1066 Blindern, 0316 Oslo, Norway

13 3) County Governor of Innlandet, P.O. box 987, 2604 Lillehammer, Norway

14 4) Zoological Museum, The Natural History Museums and Botanical Garden, University of

15 Oslo, Sars Gate 1, 0562 Oslo, Norway

16 Corresponding author: [jmo@niva.no](mailto:jmo@niva.no)

17

18

19 **Abstract**

20 Individual-based mark-recapture data from animal population provide a wealth of  
21 opportunities for studies, such as individual variation in vital rates (*e.g.* survival and  
22 reproduction) the links between vital rates and population dynamics. However, maintaining  
23 the collection of individual-based data over long time periods comes with large logistic  
24 efforts and costs, and studies spanning over decades are therefore rare. Salmonid fishes are  
25 of high ecological, cultural, and economical value, but many native wild populations remain  
26 in decline. Conservation concerns are particularly great for migratory salmonids as local  
27 adaptations and long life spans make them very vulnerable to environmental changes and  
28 habitat modifications, *e.g.*, due to hydroelectric power production. This paper describes a  
29 unique long-term mark-recapture data set from a land-locked population of large-sized,  
30 piscivorous brown trout (*Salmo trutta*) in Norway: the Hunder trout, named after the main  
31 water fall (Hunderfossen) in its spawning river. During the period 1966 to 2017, nearly  
32 15,000 Hunder trout have been captured and individually marked during their spawning  
33 migration from Lake Mjøsa to the river Gubrandsdalslågen. Fish were first captured and  
34 marked while passing a fish ladder within the hydroelectric dam at the Hunderfossen  
35 waterfall, and more than 4,000 were later recaptured there alive and/or reported as dead  
36 elsewhere. In combination with related life-history and environmental data, these data can  
37 be used to gain insights into a variety of questions regarding management and conservation  
38 of migratory salmonid populations. In this data paper, we describe (1) a database containing  
39 observations on captures and related life-history data obtained from scales (the SUSTAIN  
40 trout database), and (2) a publicly available dataset extracted from this database for analysis  
41 of survival (the SUSTAIN trout survival dataset).

42  
43  
44

45 **Introduction**

46

47 Important processes in ecology and evolution of vertebrates happen over multiple years and  
48 decades. Many areas of ecological and evolutionary research – including most of studies  
49 with the goals of improving species management and conservation – rely on the availability  
50 of data spanning long time periods. Long-term ecological data on animal populations may be  
51 collected either at the population level (*e.g.* count or occupancy surveys) or by following  
52 individuals with uniquely identifiable marks throughout their lives. Individual-based mark-  
53 recapture data resulting from the latter provide a wealth of opportunities for studies that  
54 are impossible with only population-level data, as they not only allow linking population  
55 dynamics to vital rates (*e.g.* survival, reproduction) but also enable to study individual  
56 differences in those vital rates (Clutton-Brock and Sheldon 2010). When mark-recapture  
57 studies are run over long time periods and include large numbers of individuals, as well as  
58 multiple cohorts and generations, study opportunities and investigable research questions  
59 multiply (Clutton-Brock and Sheldon 2010). However, maintaining the collection of  
60 individual-based data over long time periods comes with large logistic efforts and costs, and  
61 studies spanning many years are thus rare.

62

63 Recent decline of freshwater species abundance is more severe than species declines on  
64 land or in the ocean, according to the latest Living Planet report (WWF 2018): populations of  
65 freshwater species have declined by more than 80% on average during 50 years , while  
66 populations of land-dwelling- and oceanic species have fallen by less than 40%. Salmonid  
67 fishes, which are top predators and keystone species in many large freshwater ecosystems,  
68 are of high ecological, cultural, and economical value (Lobón-Cerviá and Sanz 2018). In spite  
69 of extensive study, however, many native wild populations remain in decline (Muhlfeld et al.  
70 2018). Conservation concerns are particularly great for migratory salmonids as local  
71 adaptations and long life spans make them very vulnerable to environmental changes and  
72 habitat modifications, *e.g.*, due to hydroelectric power production (Piccolo et al. 2012; Van  
73 Leeuwen et al. 2018). Overexploitation from fishing, but also stocking with hatchery-reared  
74 fish are important anthropogenic pressures threatening the (genetic) integrity of  
75 populations (Laikre et al. ; Post 2013). More recently, climate change has emerged as an  
76 additional threat to salmonid populations globally (Kovach et al. 2016). Unfortunately, lack

77 of knowledge and data on populations of migratory salmonids severely hamper the  
78 effectiveness of management and conservation efforts.

79

80 This paper describes a unique long-term mark-recapture data set from a land-locked  
81 population of large-sized, piscivorous brown trout (*Salmo trutta*) in Norway: the Hunder  
82 trout, named after the main water fall (Hunderfossen) in its spawning river (Figure 1). During  
83 the period 1966 to 2016, nearly 15,000 Hunder trout have been captured and individually  
84 marked during their spawning migration from Lake Mjøsa to the river Gubrandsdalslågen  
85 (Figure 2). Fish were first captured and marked while passing a fish ladder within the  
86 hydroelectric dam at the Hunderfossen waterfall, and some were later recaptured there  
87 alive and/or reported as dead elsewhere. The resulting mark-recapture-recovery data offer  
88 opportunities for studies on, for example, adult survival (a key vital rate generally  
89 understudied in salmonid research, (Drenner et al. 2012), fishing and natural mortality,  
90 spawning biology, and the usage and effectivity of the fish ladder (Haugen et al. 2008; Nater  
91 et al. (in prep.)). In combination with related life history and environmental data (also  
92 described in this paper), these data can be used to gain insights into a variety of questions  
93 regarding management and conservation of migratory salmonid populations. These include  
94 – but are not limited to – consequences of recreational fishing, hydroelectric power  
95 production, stocking programmes, and environmental disturbance (including habitat  
96 alteration and climate change).

97

98 The Hunder trout population constituted a case study of the research project SUSTAIN  
99 (harvested ecosystems in changing environments, see "Project details" below). The main  
100 goals within this case study were to develop models of growth and survival, to quantify  
101 effects of intrinsic and extrinsic factors on these demographic rates, and to project  
102 population dynamics under varying environmental conditions and harvesting strategies. To  
103 this end, data from several sources were compiled and processed in a project database  
104 (referred to as the **SUSTAIN trout database** below). The complete SUSTAIN trout database  
105 contains altogether 30,139 capture records from 14,703 individuals (1966-2016), as well as  
106 individual growth and spawning information based on scales for more than 8000 of these  
107 individuals (1966 – 2005, Aass et al. 2017).

108

109 A subset of this database was extracted for analysis of survival and cause-specific mortality  
110 (Nater et al. (in prep.)). This subset, referred to as the **SUSTAIN trout survival dataset** below,  
111 is focussed on fish captured in the trap during one or more spawning runs; the specific  
112 criteria are described in more detail in the following. Within this paper, we describe this  
113 static dataset, as well as the more comprehensive SUSTAIN trout database from which it is  
114 extracted, following the recommendation of (Penev et al. 2017)). The SUSTAIN trout survival  
115 dataset is published as a data package in Dryad [reference when available]. The SUSTAIN  
116 trout database is currently not publicly available but holds many opportunities for future  
117 research projects and collaborations.

118

119

## 120 **Study system**

121

### 122 **Lake Mjøsa and River Gudbrandsdalslågen**

123 Lake Mjøsa is a deep fjord lake (max. depth 453 m) situated in Southeast Norway (Figure 2).  
124 The surface area is 365 km<sup>2</sup>, mean depth is 153 m, and the residence time is 5.6 years. It has  
125 a large catchment of 16,5 km<sup>2</sup> with approximately 200,000 inhabitants living close to the  
126 lake. The southern parts of the catchment are dominated by pine forests, while the northern  
127 parts lie within mountainous regions, and several glaciers in this region feed the main  
128 tributary rivers with heavy silt load resulting from snow-melt during June-August. The water  
129 flow from the main river, Gudbrandsdalslågen, as well as several smaller inlets, causes  
130 reductions in transparency, temperature and algal growth in Lake Mjøsa during early  
131 summer, especially in the northern parts of the lake (Holtan 1979).

132

133 In the past, eutrophication due to excessive nutrient loads from agriculture, industry and  
134 households resulted in poor water quality and harmful algal blooms in Mjøsa in the 1970s-  
135 1980s. This triggered the Lake Mjøsa Campaign, a large restoration effort which resulted in a  
136 period of re-oligotrophication and the current good ecological status of the lake (Løvik et al.  
137 2017). The campaign also marked the start of extensive monitoring of water quality and  
138 plankton communities in Lake Mjøsa, the outcome of which are more than 40 years of  
139 physico-chemical and biological time-series data (Løvik and Moe 2016). In addition to the  
140 information on changes in water quality, these data have also revealed a trend of increasing

141 water temperature (Hobæk et al. 2012), as well as shorter ice coverage periods and more  
142 frequent floods in recent years.

143

#### 144 **The Hunder trout population**

145 A significant proportion of trout biomass caught in lake Mjøsa belongs to the Hunder trout  
146 population (Kraabøl et al. 2009). The Hunder trout is known for its large body size, and its life  
147 history and spawning biology have been thoroughly studied (Aass et al. 1989; Kraabøl 2006).  
148 Although the population is land-locked, it is very similar to Atlantic salmon and sea trout in  
149 terms of life cycle and appearance. After hatching, the young Hunder trout typically spend  
150 their first three to five years as parr in the river before smolting and migrating downstream  
151 to Lake Mjøsa (corresponding to the seaward migration of anadromous salmon and trout). In  
152 the lake they typically prey on fish for two to four years before maturing and migrating  
153 back to the river to spawn. At the time of their first spawning run, individuals are on average  
154 7 years old, weigh 3.5 kg and measure 63 cm. Subsequently, the fish perform spawning runs  
155 approximately every two years. The Hunder trout have a maximum life span of 15-20 years  
156 and a potential maximum size of 15-20 kg and >100 cm. However, less than 10 % reach ages  
157 above 10 years, and less than 1 % of the spawners reach weight above 10 kg. Historically,  
158 most of the population is believed to have spawned upstream the waterfall Hunderfossen,  
159 while some either chose or were forced to spawn downstream. The considerable strength  
160 required for the migration and particularly for ascending the large waterfall have been  
161 proposed as selection drivers for the large body sizes of this population, relative to that of  
162 trout populations spawning in other rivers draining into Lake Mjøsa (Haugen et al. 2008).

163

#### 164 **The hydropower dam and mitigation measures**

165 A hydropower dam was established at Hunderfossen between 1961 and 1964, and  
166 essentially became a barrier for the migrating Hunder trout. To restore the connectivity of  
167 the river, a fish ladder was established in 1966 (Aass 1990). The functionality of this fish  
168 ladder and its success in allowing trout to pass the dam varies among seasons and depends  
169 heavily on water temperature and -discharge, and on individual body size (Haugen et al.  
170 2008; Jensen and Aass 1995).

171 The fish ladder only functions as an upriver passage, and the dam thus reduced survival  
172 during the downriver migration for both smolt and post-spawners. The main factors

173 responsible are likely increased predation in the dammed area and mortality associated with  
174 turbine passage and migration delays (Fjeldstad et al. 2018). The damming also led to a  
175 decrease in the availability of productive fish habitats in the river both upstream and  
176 downstream of the dam (Aass et al. 1989). Potential consequences of the hydropower  
177 station have been evaluated by various studies, including recent telemetry studies (Kraabøl  
178 2015; Kraabøl et al. 2013).

179

180 To abate the reduced natural production of trout in the regulated river, a compensatory  
181 stocking programme was initiated in the mid-1960s (Aass et al. 1990). The programme  
182 entails the release of between 10,000 and 30,000 smolts into the river and lake each year  
183 and is still being continued today. Each year, eggs and sperm are collected from a fraction of  
184 the wild-born spawners that ascended the fish ladder. These are incubated in a hatchery  
185 next to the Hunderfossen dam, and the hatchling trout are reared until smolting (usually for  
186 2 years) before being stocked into the population (with their adipose fins clipped to allow  
187 recognition later). The fraction of stocked trout in the annual spawning stock (as recorded in  
188 the Hunderfossen fish ladder) has varied over time, but exceeded 50% in some more recent  
189 years (Kraabøl et al. 2009).

190

191 The establishment of the fish ladder within the Hunderfossen dam also brought new  
192 opportunities for monitoring the spawning population. Concurrent with the opening of the  
193 fish ladder in 1966, a mark-recapture program was initiated and was run continuously until it  
194 was terminated in 2016. This monitoring program has resulted in several unique long-term  
195 data series including the 50-year time-series of mark-recapture data presented in this paper.

196

#### 197 **Data collection**

198 In the following, we describe the generation of mark-recapture data from several activities:  
199 captures and marking of adult fish in the fish ladder, recaptures in the fish ladder, recaptures  
200 by fishers, release of smolt from the stocking programme (years 1966 – 2017, Figures 4 & 5).  
201 We also give an overview of additional data on body growth and spawning schedules  
202 obtained from the scales of marked individuals. All data were originally collected, recorded,  
203 and maintained by several individuals and institutions, as listed in the Acknowledgements  
204 section.

205

206 Marking: All ascending trout were trapped in the fish ladder at the Hunderfossen  
207 hydropower dam on their spawning run. Trapped fish were sexed based on secondary sex  
208 characteristics and their origin (wild or stocked) determined based on whether the adipose  
209 fin was intact (removed = stocked). After registration and sampling, the fish were  
210 individually tagged with Carlin tags, consisting of a disc with information and a stainless steel  
211 thread to attach to the fish (Figure 6). After tagging, the fish were released into the fish  
212 ladder above the trap, allowing them to pass the dam and continue their migration to the  
213 upriver spawning areas.

214

215 Recaptures:

216 Marked fish could be recaptured either in the fish ladder during later spawning runs, or by  
217 fishers in the river or the lake. Alternatively, fish could also be found dead in other locations.  
218 Fish that were recaptured in the ladder were measured and sampled in the same way as  
219 during initial marking (except that they did not receive a new mark, but were instead  
220 registered with their previously assigned identity number). When fish were caught by fishers  
221 and reported, the amount of data collected varied. As a minimum, fishers would report the  
222 tag number of the caught fish, the date of capture, and whether the fish was killed or  
223 released. Additional information could include capture location, fishing gear, sex, origin,  
224 length, and weight. Reporting the capture/harvest of a marked trout was voluntary, and no  
225 monetary reward was given in exchange. As a likely consequence, fisher's rate of reporting  
226 caught trout has declined over time from an initial 80% in 1967 to only 10% in 2016 (Nater et  
227 al. 2019).

228

229 Smolt releases: All hatchery-reared trout stocked into the population were marked as such  
230 by removal of the adipose fin prior to release into the river or lake. In some years during the  
231 1980s and 1990s, a subset of the released smolt additionally received individual Carlin tags  
232 at release (amounting to close to 50,000 tagged over time). The purpose of this smolt  
233 tagging was to evaluate and optimize the stocking strategy, and some (but not all) of the  
234 individual-level data on releases and recaptures of stocked smolt have been integrated into  
235 the mark-recapture data set.

236



237 Analysis of scales: During the whole period 1965-2016, 4-6 scales were sampled from all fish  
238 captured in the ladder. For a subset of approximately 8,000 individuals who climbed the fish  
239 ladder between 1966 and 2005, the sampled scales have been analysed using  
240 schlerochronological methods (Figure 7). These analyses have provided information on  
241 development, somatic growth, migration, and spawning (Aass et al. 2017; Jensen and Aass  
242 1995). Specifically, measurements of the year rings on the scales have been used to back-  
243 calculate yearly growth, and to identify and analyse important life-history information such  
244 as hatching year, age and size at smolting, growth in lake, age and size at sexual maturation,  
245 and the number of spawning events (Aass et al. 2017; Haugen et al. 2008; Nater et al. 2018).  
246

#### 247 **The SUSTAIN trout database**

248

249 The **SUSTAIN trout database** is a compilation of all available data on individuals, captures  
250 and scale-based information (growth and life history schedules) available for the Hunder  
251 trout. The main purpose of this database was to organise data for analyses in the SUSTAIN  
252 project, and the database has not been made publicly available. We nevertheless provide a  
253 description of this database and its structure both to explain the context for the published  
254 **SUSTAIN trout survival dataset**, and to give a perspective on its potential future uses in  
255 combination with related data.

256

#### 257 **Methods: Data compilation and processing**

258

##### 259 **Data sources**

260 The database was compiled from four main data sources (Table 1).

261 (1) Individual mark list: table containing individual-level information on marking, sex, origin,  
262 length, weight, release site etc. Obtained from the County Governors of Hedmark and  
263 Oppland (2016).

264 (2) Mark series list: table containing ranges of mark numbers with common information on  
265 release date, release site, origin (wild or stocked) and stage (smolt or spawner). Obtained  
266 from the County Governors of Hedmark and Oppland (2016).

267 (3) Recaptures dataset: table containing all information related to recapture events  
268 including date/year, location, equipment, length, weight, and other information.

269 Obtained from “Merkesentralen” at NINA (Norwegian Institute for Nature Research),  
270 directly and via the County Governor of Oppland (2016).

271 (4) Growth dataset: table containing all information derived from scales (estimated growth,  
272 smolting and spawning). Owned and provided by Per Aass and Atle Rustadbakken,  
273 mainly digitized by the County Governor of Hedmark; described in Aass et al. 2017.

274

#### 275 **Data structure**

276 The database is organised as 5 main tables (Figure 8) containing information on individual  
277 fish (**t\_Individual**), captures (**t\_Capture**), growth in the river (**t\_GrowthRiver**), growth in the  
278 lake (**t\_GrowthLake**), and spawning events in the river (**t\_Spawning**). A description of the  
279 main fields is given in Table 1, while more explanation to the table structure is given below.

280

281 **t\_Individual** is a table summarising all individual-level information that does not change over  
282 time. Within this table, each individual is defined by its mark number (**MarkNo**, see Figure  
283 6), and this is associated with sex, origin (wild or stocked), and various information from the  
284 initial marking event including date (only year in some cases), length, weight, whether the  
285 individual was marked as a spawner or as smolt (**ReleaseStage**), etc. The total number of  
286 captures per individual (**CaptureNoMax**) is derived from the table **t\_Capture**.

287

288 The table **t\_Capture** contains one or more captures for each individual, and each entry is  
289 defined by a unique combination of **MarkNo** and **CaptureNo**. The marking event represents  
290 the first capture of an individual and is given the value **CaptureNo** = 1, regardless of whether  
291 the fish were marked as spawners or smolts. **t\_Capture** contains all information related to  
292 the specific captures, such as capture date, location, type, and equipment, as well as the  
293 individual’s measured length and weight, and status before and after capture (dead or alive).  
294 This table also contains life-history information derived from scales such as age and length at  
295 smolting and maturation, the number of spawning migrations (stored in **t\_GrowthRiver**,  
296 **t\_GrowthLake** and **t\_Spawning**). Such information does, in principle, belong to the  
297 individual level as it should not change throughout life. However, this information is derived  
298 from scales, and the estimates from scales taken at different captures of the same individual  
299 may. Therefore, this information has been stored at the capture level.

300

301 The complete information on growth derived from the scale analysis (Figure 7) is stored in  
302 two tables representing the river phase of life (i.e. from birth to smolting; **t\_GrowthRiver**)  
303 and the lake phase of life (post-smolting and including later spawning runs; **t\_GrowthLake**).  
304 The reason for estimating lake growth separately is that scales are sometimes lost and  
305 replaced by new scales, e.g. after the fish has migrated to the lake. The replacement scales  
306 cannot always represent the complete river phase but can still be used to estimate the  
307 growth in the lake phase. **t\_GrowthRiver** contains estimated individual records of age and  
308 length in each year from the year of smolting (clearly visible on the scale, Figure 7) back to  
309 the first year (**AgeRiver** = 1). Likewise, **t\_GrowthLake** contains individual records of age and  
310 length in each year from the sampling (= capture) year back to the first year in the lake  
311 (**AgeLake**= 1). The estimated lake age and river age at capture is stored in **t\_Capture** as  
312 **AgeLakeMax** and **AgeRiverMax**, respectively. The estimated **AgeAtSmolting** corresponds to  
313 **AgeRiverMax** when this is available. (For fish marked as smolt rather than as spawners, the  
314 **AgeAtSmolting** is known). In cases where information from the river phase is intact, the  
315 **AgeAtCapture** is the sum of **AgeRiverMax** and **AgeLakeMax**.

316

317 All information on individual spawning schedules derived from scale analysis (Figure 7) are  
318 stored in **t\_Spawning**. This table contains the estimated year, age (or **AgeLake**) and length  
319 for all spawning events of each individual. The **AgeAtMaturation** and **LengthAtMaturation**  
320 field in **t\_Capture** correspond to the estimated age and length at the first spawning event  
321 here.

322

### 323 **Metadata information**

324 All data fields in the **SUSTAIN trout database** are described briefly in Table 1. In the next  
325 section, we describe the subset of fields that are present in the published **SUSTAIN trout**  
326 **survival dataset** in more detail.

327

### 328 **Summary of contents**

329 The complete **SUSTAIN trout database** contains and links mark-recapture data and  
330 individual-level data on growth trajectories and spawning schedules of the Hunder trout  
331 over 50 years.

332 The mark-recapture data contains altogether 43,249 capture records from all years 1966-  
333 2017 (Table 3). 27,773 of these are individual marking events from the years 1966-2015,  
334 representing either the first capture of mature trout in the ladder (14,624 individuals) or the  
335 release of tagged smolt (13,149 individuals). The remaining capture records are recaptures  
336 by different means (as defined by **CaptureType**): 2,190 recaptures in the trap (378 of which  
337 resulted in death); 12,905 harvest reports (8,976 in the lake, 3796 in the river and 133 in  
338 other or unknown locations); 105 reports of fish found dead; and 20 reports of catch-and-  
339 release fishing. The individual-level data on growth trajectories contains 29,940 size-at-age  
340 records for 5,115 individuals. The individual-level data on spawning schedules contains 7,189  
341 spawning records of 5,007 individuals. All these individuals been captured in the  
342 Hunderfossen fish ladder during the period 1966-2005 (Aass et al., 2017) and are also  
343 contained in the mark-recapture data.

344

#### 345 **Technical description**

346 **Object name:** SUSTAIN trout database

347 **Character encoding:** UTF-16

348 **Format name:** Microsoft Access Database

349 **Format version:** Microsoft® Access® 2016 MSO (16.0.9226.2114) 32-bit as part of Microsoft  
350 Office 365 ProPlus

351 **Distribution:** The database is not published. Information on access to the data can be  
352 obtained from the corresponding author.

353

#### 354 **Coverage**

355 **Temporal coverage:** Capture records from all years 1966-2017.

356 **Spatial coverage:** The spatial extent of river and lake used by Hunder trout spans the  
357 latitudes 60.40° - 61.22°N and 10.43° - 11.29°E (Fig. 1). The altitude ranges from 175 m  
358 (upper end of river spawning areas) to 123 m (lake surface).

359 **Taxonomic coverage:** The data are from a single population of large-sized brown trout  
360 (*Salmo trutta*) (Figure 1) inhabiting Lake Mjøsa and spawning in River Gudbrandsdalslågen.

361 **Taxonomic ranks:** Kingdom: Animalia; Phylum: Chordata; Class: Osteichthyes; Order:  
362 Salmoniformes; Family: Salmonidae; Species: *Salmo trutta* (L., 1758).

363 **Common name:** brown trout, Hunder trout

364

365

## 366 **The SUSTAIN trout survival dataset**

367

### 368 **Methods: Extraction of dataset for publication of survival analysis**

369 The majority of the mark-recapture data from the **SUSTAIN trout database** has been  
370 extracted and organised into a single flat table for analysing survival of mature adult trout  
371 (Nater et al. in prep). This dataset conditions on the adult trout having passed the  
372 Hunderfossen fish ladder on a spawning migration at least once and was extracted from the  
373 database using the following criteria:

- 374 - Removal of 13,146 records with CaptureType = “smolt release” (See Table 3).  
375 Subsequent recaptures in the fish ladder of fish marked as smolts (CaptureType = trap  
376 alive”, 222 records) were kept in the dataset, and the fields CaptureNo and  
377 CaptureNoMax were adjusted accordingly (minus 1).
- 378 - Exclusion of all records with Exclude = “yes” (due to different quality issues described in  
379 Comment fields)

380

### 381 **Data structure and metadata information**

382 The SUSTAIN trout survival dataset is a flat table containing the columns described below (cf.  
383 Table 1).

384

385 **MarkNo:** The alphanumeric code of an individual’s tag (Figure 6). All information on  
386 individual fish is linked to the MarkNo.

387 **CaptureNo:** The running number of the captures of an individual ordered by capture date,  
388 including the marking event as CaptureNo = 1.

389 **CaptureNoMax:** The total number of captures of an individual.

390 **MarkDate:** The exact date of the marking event, if this information is available.

391 **MarkYear:** The year of the marking event (a mandatory field).

392 **CaptureDate:** The exact date of the capture, if this information is available. For records with  
393 missing CaptureDate, the database contains a dummy date (1. January) with the correct  
394 year. The dummy data was necessary for the ordering of captures and assignment of  
395 CaptureNo also for repeated captures of an individual within one year.

396 **CaptureYear:** The year of the capture.

397 **CaptureArea:** Area of the capture. All captures in the trap at the Hunderfossen dam  
398 (including marking) are denoted as “river trap”. The reported locations of harvests (captures  
399 by fishers) are aggregated into five areas (see Fig. 1): "lake" (between Minnesund and  
400 Lillehammer), "river below" (between Lillehammer and Hunderfossen), "river above"  
401 (between Hunderfossen and Harpefossen), “river” (north of Lillehammer, but unclear if  
402 above or below Hunderfossen), and "far away" (elsewhere).

403 **CaptureType:** Classification of the type of capture events based on a combination of the  
404 fields CaptureArea, StatusBeforeCapture and StatusAfterCapture (Table 2, Figures 4 and 5).  
405 The distinguished capture types are defined as follows: “trap alive” = captured in the fish  
406 ladder during a spawning run and released alive, “trap dead” = captured in the fish ladder  
407 during a spawning run but died prior to/shortly after release (or found dead in the  
408 immediate vicinity of the fish ladder), “harvest” = captured by a fisher and killed, “catch  
409 release” = captured by a fisher and released alive (only started becoming more common  
410 towards the end of the study period), “found dead” = found dead in any location other than  
411 the fish ladder, and “smolt release” = release of hatchery fish marked as smolt. The capture  
412 type “smolt release” is not technically a capture, but it was most convenient to store the  
413 information related to these events as a capture.

414 **CaptureEquipment:** The gear involved in the capture summarised into five standardised  
415 categories (based on more detailed reported information of equipment). For harvest  
416 captures, the fishing gear has been categorised as either "net" or "rod"; for other capture  
417 types, the possible values are "trap", "dead in trap", or "found dead".

418 **LengthAtCapture:** The measured length of the fish at the capture (unit mm; Figure 1). The  
419 distribution of body sizes measured in the data over time are presented in Figure 9.

420 **WeightAtCapture:** The measured weight of the fish at the capture (unit g).

421 **Sex:** Individuals are categorised as female, male or NA. The representation of female vs.  
422 male individuals in the dataset is visualized in Figure 10.

423 **Origin:** Individuals are categorised as wild, stocked or NA. Stocked individuals have been  
424 reared in the hatchery near Hunderfossen, and are recognizable by their clipped adipose fin.  
425 The representation of wild vs. stocked individuals in the dataset is visualized in Figure 3.

426 **Scale\_Growth:** Information on whether data on somatic growth (inferred from scale  
427 analysis) for this individual is available in the **SUSTAIN trout database** (“yes”/”no”).

428 **Scale\_Spawning:** Information on whether data on spawning schedules (inferred from scale  
429 analysis) for this individual is available in the **SUSTAIN trout database** (“yes”/”no”).

430 **SurvivalAnalysis:** Information on whether this capture event was included in the survival  
431 analysis of Nater et al. (2019).

432

### 433 **Summary of contents**

434 The contains 19,489 capture records of 14,890 individuals from all years 1966-2016.

435 Captures of all types except “smolt release” are present: “trap alive” (16,726 records),  
436 14,890 marking events (until 2015), 4,599 recaptures in the trap, and 2,306 harvests (Table  
437 3).

438

439 The **SUSTAIN trout survival dataset** contains altogether 19,505 capture records from all  
440 years 1966-2017 (Table 3). Of these, 14,890 are individual marking events of mature trout in  
441 the ladder. The remaining 4,615 capture records are recaptures by different means (as  
442 defined by **CaptureType**): 1,863 recaptures in the trap (372 of which resulted in death);  
443 2,322 harvest reports (1,944 in the lake, 358 in the river, 20 in other or unknown locations);  
444 76 reports of fish found dead; and 9 reports of catch-and-release fishing.

445

446 Further adaptation of this dataset to the survival analysis (Nater et al. (in prep.)) resulted in  
447 the exclusion of capture histories for 2015 individuals. These are flagged in the column  
448 “SurvivalAnalysis” in the published dataset. The 12,875 individual capture histories included  
449 in that analysis contain 1,588 trap recaptures and 2,252 harvest events (Table 3).

450

### 451 **Technical description**

452 **Object name:** SUSTAIN trout survival dataset

453 **Character encoding:** UTF-16

454 **Format name:** comma-separated values (csv)

455 **Distribution:** *[link to Dryad when available]*

456 **Publication date:** 2019-xx-xx *[will be inserted when available]*

457 **Language:** English

458 **Licenses of use:** Data have been made available under the Creative Commons CCZero

459 **Waiver:** <http://creativecommons.org/publicdomain/zero/1.0/>. Thus, the

460 data can be freely used for non-commercial purposes provided the source is acknowledged  
461 and this data paper is cited.

462 See Creative Commons for more details of the conditions of usage.

463

#### 464 **Coverage**

465 The temporal, spatial and taxonomic coverage of the SUSTAIN trout survival dataset is  
466 identical to that of the full SUSTAIN trout database, except that it excludes all smolt release  
467 events, and all recaptures of individuals released as smolt which never entered the fish  
468 ladder.

469

470 **Data published through Dryad:** [\[link when available\]](#)

471

472

473

474

#### 475 **Project details**

476 **Project title:** Sustainable management of renewable resources in a changing environment:  
477 an integrates approach across ecosystems (SUSTAIN). <https://www.sustain.uio.no/>

478 **Subject:** Work Package 1: Demographic structure in harvested ecosystems.

479 <https://www.sustain.uio.no/research/wp/work-package-1/>

480 **Case study:** Mjøsa lake (brown trout). [https://www.sustain.uio.no/research/case-](https://www.sustain.uio.no/research/case-studies/case_study_6/index.html)  
481 [studies/case\\_study\\_6/index.html](https://www.sustain.uio.no/research/case-studies/case_study_6/index.html)

482 **Funding:** Research Council of Norway, contract no. 244647/E10

483

#### 484 **Acknowledgements**

485 The project SUSTAIN (Research Council of Norway, contract no. 244647/E10) has funded the  
486 compilation of the SUSTAIN trout database and the writing of this data paper.

487 Collection and maintenance of the data has been financed, carried out, and supported by  
488 several institutions and individuals. Eidsiva Vannkraft AS, who operate the Hunderfossen

489 dam and powerplant, have been responsible for both the stocking programme (since

490 initialization) and the marking and recapturing of trout in the fish ladder (since 1988). Special

491 thanks go Åse Brenden and Frank Hansen for their outstanding contributions to the



492 operation of the hatchery and stocking programme. The “Merkesentralen” of NINA  
493 (Norwegian Institute for Nature Research) has been in charge of managing the system for  
494 the reports of tags from outside the fish ladder (especially from harvest). We acknowledge  
495 the substantial contribution of the local fishers who have voluntarily reported tags and  
496 associated information on their catches over half a century. The Country Governor of  
497 Oppland has played a vital role in combining and maintaining the data from both the  
498 marking and recaptures at Hunderfossen and the reported tags, and data maintenance and  
499 cleaning has been supported by Miljødirektoratet. Thron O. Haugen has contributed  
500 substantially to earlier efforts of partially cleaning and harmonising the data throughout the  
501 last 15 years.

502

### 503 **References**

- 504 Aass P (1990) Utsetting av Hunderørret i Mjøsa og Lågen, 1965-1989. Fylkesmannen i Oppland,  
505 Miljøvernnavdelingen (In Norwegian). pp.
- 506 Aass P, Nielsen PS, Brabrand Å (1989) Effects of river regulation on the structure of a fast-growing  
507 brown trout (*Salmo trutta* L.) population. Regulated Rivers: Research & Management 3: 255-  
508 266. doi:[doi:10.1002/rrr.3450030125](https://doi.org/10.1002/rrr.3450030125)
- 509 Aass P, Rustadbakken A, Moe SJ, Lund E, Qvenild T (2017) Life-history data on Hunder brown trout  
510 (*Salmo trutta*) from Lake Mjøsa, Norway. Freshwater Metadata Journal 25: 1-11
- 511 Clutton-Brock T, Sheldon BC (2010) Individuals and populations: the role of long-term, individual-  
512 based studies of animals in ecology and evolutionary biology. Trends in Ecology & Evolution  
513 25: 562-573. doi:<https://doi.org/10.1016/j.tree.2010.08.002>
- 514 Drenner SM, Clark TD, Whitney CK, Martins EG, Cooke SJ, Hinch SG (2012) A Synthesis of Tagging  
515 Studies Examining the Behaviour and Survival of Anadromous Salmonids in Marine  
516 Environments. PLOS ONE 7: e31311. doi:[10.1371/journal.pone.0031311](https://doi.org/10.1371/journal.pone.0031311)
- 517 Fjeldstad H-P, Pulg U, Forseth T (2018) Safe two-way migration for salmonids and eel past  
518 hydropower structures in Europe: a review and recommendations for best-practice solutions.  
519 Marine and Freshwater Research 69: 1834-1847. doi:<https://doi.org/10.1071/MF18120>
- 520 Haugen TO, Aass P, Stenseth NC, Vøllestad LA (2008) Changes in selection and evolutionary  
521 responses in migratory brown trout following the construction of a fish ladder. Evolutionary  
522 applications 1: 319-335. doi:[10.1111/j.1752-4571.2008.00031.x](https://doi.org/10.1111/j.1752-4571.2008.00031.x)
- 523 Hobæk A, Løvik JE, Rohrlack T, Moe SJ, Grung M, Bennion H, Clarke G, Piliposyan GT (2012)  
524 Eutrophication, recovery and temperature in Lake Mjøsa: detecting trends with monitoring

- 525 data and sediment records. *Freshwater Biology* 57: 1998-2014. doi:10.1111/j.1365-  
526 2427.2012.02832.x
- 527 Holtan H (1979) The Lake Mjøsa story. *Arc Hydrobiol Beih*, 13: 242-258
- 528 Jensen AJ, Aass P (1995) Migration of a fast-growing population of brown trout (*Salmo trutta* L.)  
529 through a fish ladder in relation to water flow and water temperature. *Regulated Rivers:*  
530 *Research & Management* 10: 217-228. doi:doi:10.1002/rrr.3450100216
- 531 Kovach RP, Muhlfeld CC, Al-Chokhachy R, Dunham JB, Letcher BH, Kershner JL (2016) Impacts of  
532 climatic variation on trout: a global synthesis and path forward. *Reviews in Fish Biology and*  
533 *Fisheries* 26: 135-151. doi:10.1007/s11160-015-9414-x
- 534 Kraabøl M (2006) Spawning biology of brown trout (*Salmo trutta* L.) in River Gudbrandsdalslågen  
535 below Hunderfossen Power Plant – NINA Report 217. 34 p. (In Norwegian with English  
536 summary). pp.
- 537 Kraabøl M, Dervo, B. K. & Museth, J. (2015) Downstream migration routes and effects of spillwater  
538 release through an ice- and trash spillway on downstream migrating kelts and smolts of the  
539 Hunder trout at Hunderfossen Power Station in River Gudbrandsdalslågen. *Telemetry studies*  
540 *conducted during autumn 2014 and spring 2015.* - NINA Report 1187. 36 p. (In Norwegian  
541 with English summary). pp.
- 542 Kraabøl M, Museth J, Johnsen SI (2009) The history of commercial and recreational fisheries  
543 exploiting migratory brown trout populations in Lake Mjøsa, with emphasis on the effects of  
544 compensatory stocking strategies on the Hunder trout population. - NINA Report 485. 43 p.  
545 (In Norwegian with English summary). pp.
- 546 Kraabøl M, Museth J, Johnsen SI, Skurdal J, Dokk JG (2013) Telemetry studies of downstream  
547 migrating Hunder trout smolts and kelts at Hunderfossen power plant in River  
548 Gudbrandsdalslågen in 2011 and 2012. - NINA Report 940. 41 p. (In Norwegian with English  
549 summary). pp.
- 550 Laikre L, Schwartz Mk Fau - Waples RS, Waples Rs Fau - Ryman N, Ryman N Compromising genetic  
551 diversity in the wild: unmonitored large-scale release of plants and animals.
- 552 Lobón-Cervía J, Sanz N (2018) *Brown Trout: Biology, Ecology and Management.* Hoboken, NJ, USA,  
553 Wiley., pp.
- 554 Løvik JE, Moe SJ (2016) Time series of plankton data from Lake Mjøsa, Norway. *Freshwater*  
555 *Metadata Journal* 18: 1-9. doi:10.15504/fmj.2016.18
- 556 Løvik JE, Solheim AL, Eriksen TE, Kile MR, Skjelbred B (2017) Tiltaksorientert overvåking i vannområde  
557 Mjøsa. Årsrapport for 2016. NIVA Report no. 7144-2017. NIVA, 103 pp.
- 558 Muhlfeld CC, Dauwalter DC, Kovach RP, Kershner JL, Williams JE, Epifanio J (2018) Trout in hot water:  
559 A call for global action. *Science* 360: 866-867. doi:10.1126/science.aat8455

- 560 Nater CR, Rustadbakken A, Ergon T, Langangen Ø, Moe SJ, Vindenes Y, Vøllestad LA, Aass P (2018)  
561 Individual heterogeneity and early life conditions shape growth in a freshwater top predator.  
562 Ecology 99: 1011-1017. doi:doi:10.1002/ecy.2178
- 563 Nater CR, Vindenes Y, Cole D, Langangen Ø, Moe SJ, Turek D, Vøllestad LA, Ergon T ((in prep.))  
564 Estimating cause- and size-specific mortality hazard rates using mark-recapture-recovery  
565 data. Ecology (in prep.):
- 566 Penev L, Mietchen D, Chavan VS, Hagedorn G, Smith VS, Shotton D, Ó Tuama É, Senderov V, Georgiev  
567 T, Stoev P, Groom QJ, Remsen D, Edmunds SC (2017) Strategies and guidelines for scholarly  
568 publishing of biodiversity data. Research Ideas and Outcomes 3. doi:10.3897/rio.3.e12431
- 569 Piccolo JJ, Norrgård JR, Greenberg LA, Schmitz M, Bergman E (2012) Conservation of endemic  
570 landlocked salmonids in regulated rivers: a case-study from Lake Vänern, Sweden. Fish and  
571 Fisheries 13: 418-433. doi:doi:10.1111/j.1467-2979.2011.00437.x
- 572 Post JR (2013) Resilient recreational fisheries or prone to collapse? A decade of research on the  
573 science and management of recreational fisheries. Fisheries Management and Ecology 20:  
574 99-110. doi:doi:10.1111/fme.12008
- 575 Van Leeuwen CHA, Dalen K, Museth J, Junge C, Vøllestad LA (2018) Habitat fragmentation has  
576 interactive effects on the population genetic diversity and individual behaviour of a  
577 freshwater salmonid fish. River Research and Applications 34: 60-68.  
578 doi:doi:10.1002/rra.3226
- 579 WWF (2018) Living Planet Report - 2018: Aiming Higher. Grooten, M. and Almond, R.E.A.(Eds). WWF,  
580 Gland, Switzerland. pp.  
581  
582

**Table 1.** Description of the main fields of the SUSTAIN trout database (see Figure 8). The column "Published" indicates which fields are published in the SUSTAIN trout survival dataset.

| Table name   | Field name      | Data type        | Values (examples) | Comment                                                      | Main data source                       | Published |
|--------------|-----------------|------------------|-------------------|--------------------------------------------------------------|----------------------------------------|-----------|
| t_Individual | MarkNo          | Text             |                   | Unique code of individual's tag. Key field.                  | Individual mark list                   | yes       |
| t_Individual | MarkDate        | Date/Time        |                   | Date of marking (if available)                               | Individual mark list                   | yes       |
| t_Individual | MarkYear        | Number (integer) |                   | Year of marking (mandatory)                                  | Individual mark list                   | yes       |
| t_Individual | LengthAtMarking | Number (double)  |                   | Measured length at marking (mm)                              | Individual mark list                   | no        |
| t_Individual | WeightAtMarking | Number (double)  |                   | Measured weight at marking (g)                               | Individual mark list                   | no        |
| t_Individual | MarkType        | Text             | Carlin, Floy      | Type of mark                                                 | Individual mark list                   | no        |
| t_Individual | Sex             | Text             | female, male      | Individual's sex                                             | Individual mark list                   | yes       |
| t_Individual | Origin          | Text             | wild, stocked     | Individual's origin                                          | Individual mark list; Mark series list | yes       |
| t_Individual | ReleaseStage    | Text             | smolt, spawner    | Life-history stage at the time of mark and release           | Individual mark list; Mark series list | no        |
| t_Individual | ReleaseSite     | Text             |                   | Location of release after marking                            | Individual mark list; Mark series list | no        |
| t_Individual | ReleaseSeason   | Text             | fall, spring      | Only for smolt releases: season of release                   | Individual mark list; Mark series list | no        |
| t_Individual | CaptureNoMax    | Number (integer) |                   | The total number of captures per individual (from t_Capture) | Recaptures dataset                     | yes       |
| t_Capture    | MarkNo          | Text             |                   | (Described above)                                            | Recaptures dataset                     | no        |
| t_Capture    | CaptureNo       | Number (integer) |                   | Capture number (running number)                              | Recaptures dataset                     | yes       |
| t_Capture    | CaptureDate     | Date/Time        |                   | Date of capture (if available)                               | Recaptures dataset                     | yes       |
| t_Capture    | CaptureYear     | Number (integer) |                   | Year of capture (mandatory)                                  | Recaptures dataset                     | yes       |
| t_Capture    | LengthAtCapture | Number (double)  |                   | Measured length at capture (mm)                              | Recaptures dataset                     | yes       |
| t_Capture    | WeightAtCapture | Number (double)  |                   | Measured weight at capture (g)                               | Recaptures dataset                     | yes       |

|           |                    |                  |                                       |                                                                                                               |                                      |     |
|-----------|--------------------|------------------|---------------------------------------|---------------------------------------------------------------------------------------------------------------|--------------------------------------|-----|
| t_Capture | AgeAtCapture       | Number (integer) |                                       | Estimated age at capture (from scales)                                                                        | Growth dataset                       | no  |
| t_Capture | AgeMaxRiver        | Number (integer) |                                       | Estimated maximum age in the river phase (before smolting, from scales)                                       | Growth dataset                       | no  |
| t_Capture | AgeMaxLake         | Number (integer) |                                       | Estimated number of years since smolting, at the time of capture (from scales)                                | Growth dataset                       | no  |
| t_Capture | AgeAtSmolting      | Number (integer) |                                       | Estimated age at smolting (= AgeMaxRiver, from scales), alternatively from marking lists (for smolt releases) | Growth dataset; Individual mark list | no  |
| t_Capture | LengthAtSmolting   | Number (double)  |                                       | Estimated length at smolting (median, from scales)                                                            | Growth dataset                       | no  |
| t_Capture | AgeAtMaturation    | Number (integer) |                                       | Estimated age at the first spawning event (from scales)                                                       | Growth dataset                       | no  |
| t_Capture | LengthAtMaturation | Number (double)  |                                       | Estimated length at the first spawning event (from scales)                                                    | Growth dataset                       | no  |
| t_Capture | NoOfMigrations     | Number (integer) |                                       | Estimated number of spawning events (from scales)                                                             | Growth dataset                       | no  |
| t_Capture | HatchYear          | Number (integer) |                                       | Estimated year of hatching (age = 0, from scales)                                                             | Growth dataset                       | no  |
| t_Capture | CaptureLocation    | Text             |                                       | Detailed information on capture location (if available)                                                       | Recaptures dataset                   | no  |
| t_Capture | CaptureArea        | Text             | river trap, river above, river below, | Standardised values derived from more detailed CaptureLocation                                                | Recaptures dataset                   | yes |

|               |                     |                  |                                                      |                                                                             |                    |     |
|---------------|---------------------|------------------|------------------------------------------------------|-----------------------------------------------------------------------------|--------------------|-----|
|               |                     |                  | river, lake,<br>far away                             |                                                                             |                    |     |
| t_Capture     | CaptureEquipment    | Text             | net, rod,<br>trap, dead<br>in trap,<br>found<br>dead | Standardised<br>values derived<br>from more<br>detailed<br>information      | Recaptures dataset | yes |
| t_Capture     | StatusBeforeCapture | Text             | alive, dead                                          | Standardised<br>values derived<br>from more<br>detailed<br>information      | Recaptures dataset | no  |
| t_Capture     | StatusAfterCapture  | Text             | alive, dead                                          | Standardised<br>values derived<br>from more<br>detailed<br>information      | Recaptures dataset | no  |
| t_Capture     | CaptureType         | Text             | See Table<br>3                                       | See Table 3                                                                 | Recaptures dataset | yes |
| t_GrowthLake  | AgeLake             | Number (integer) |                                                      | Estimated<br>number of years<br>since smolting                              | Growth dataset     | no  |
| t_GrowthRiver | AgeRiver            | Number (integer) |                                                      | Estimated<br>number of years<br>since smolting                              | Growth dataset     | no  |
| t_GrowthRiver | LengthRiver         | Number (double)  |                                                      | Estimated<br>length at the<br>given AgeRiver                                | Growth dataset     | no  |
| t_GrowthLake  | LengthLake          | Number (double)  |                                                      | Estimated<br>length at the<br>given AgeLake                                 | Growth dataset     | no  |
| t_Spawning    | SpawningNo          | Number (integer) |                                                      | Spawning event<br>number                                                    | Growth dataset     | no  |
| t_Spawning    | SpawningYear        | Number (integer) |                                                      | Estimated year<br>of the spawning<br>event (derived<br>from<br>CaptureYear) | Growth dataset     | no  |
| t_Spawning    | LengthAtSpawning    | Number (double)  |                                                      | Estimated<br>length at the<br>given<br>SpawningNo<br>(mm)                   | Growth dataset     | no  |
| t_Spawning    | AgeLakeAtSpawning   | Number (integer) |                                                      | Estimated<br>AgeLake at the<br>given<br>SpawningNo                          | Growth dataset     | no  |
| t_Spawning    | AgeAtSpawning       | Number (integer) |                                                      | Estimated total<br>age at the given<br>SpawningNo                           | Growth dataset     | no  |
| t_Spawning    | SpawningNoMax       | Number (integer) |                                                      | Estimated total<br>number of<br>spawning<br>events                          | Growth dataset     | no  |

583

584

585 **Table 2.** Definition of the field CaptureType.

586

| Capture Area  | StatusBefore Capture | StatusAfter Capture | Other criteria                         | Capture Type  |
|---------------|----------------------|---------------------|----------------------------------------|---------------|
| trap          | alive                | alive               | ReleaseStage = smolt AND CaptureNo = 1 | smolt release |
| trap          | alive                | alive               | ReleaseStage ≠ smolt OR CaptureNo ≠ 1  | trap alive    |
| trap          | alive                | dead                |                                        | trap dead     |
| river or lake | alive                | alive               |                                        | catch release |
| river or lake | alive                | dead                |                                        | harvest       |
| river or lake | dead                 | dead                |                                        | found dead    |

587

588

**Table 3.** Overview of contents in the SUSTAIN trout database and the SUSTAIN trout survival dataset. Note: for individuals marked as smolt, the marking event is identical to CaptureType = “smolt release”.

| SUSTAIN data object                            | Stage at marking | No. of marked individuals (CaptureNo = 1) | No. of recaptured individuals (CaptureNo > 1) | No. of recaptures per type (CaptureNo > 1) |           |         |               |            | Total no. of recaptures (all types) | Total no. of captures (including marking event) |
|------------------------------------------------|------------------|-------------------------------------------|-----------------------------------------------|--------------------------------------------|-----------|---------|---------------|------------|-------------------------------------|-------------------------------------------------|
|                                                |                  |                                           |                                               | trap alive                                 | trap dead | harvest | catch release | found dead |                                     |                                                 |
| trout database                                 | spawner          | 14 624                                    | 4 046                                         | 1 820                                      | 370       | 2 243   | 9             | 76         | 4 518                               | 19 142                                          |
|                                                | smolt            | 13 149                                    | 10 861                                        | 238                                        | 8         | 10 662  | 21            | 29         | 10 958                              | 24 107                                          |
| trout survival dataset                         | spawner          | 14 891                                    | 4 141                                         | 1 836                                      | 372       | 2 322   | 9             | 76         | 4 615                               | 19 506                                          |
| trout survival dataset: selection for analysis | spawner          | 12 876                                    | 3 604                                         | 1 459                                      | 128       | 2 252   | -             | -          | 3 839                               | 16 715                                          |



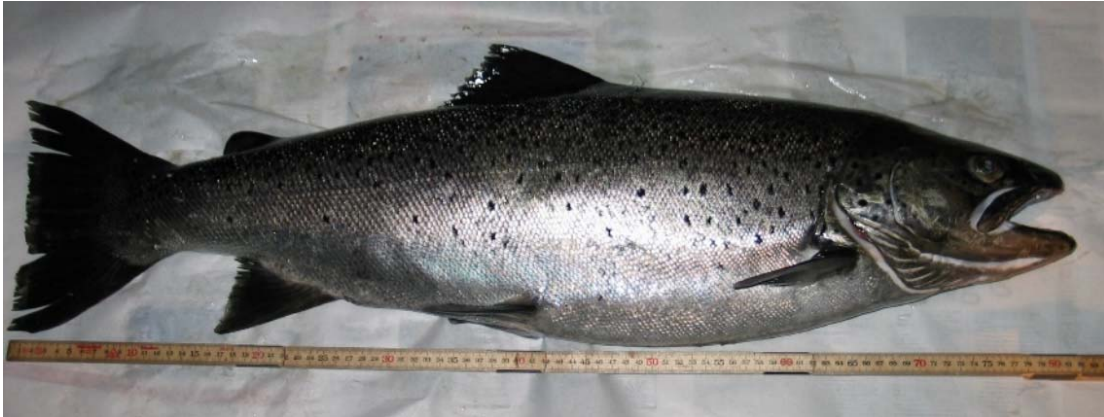

**Figure 1.** Example of Hunder trout with a body length of approximately 80 cm. Photo: Atle Rustadbakken.

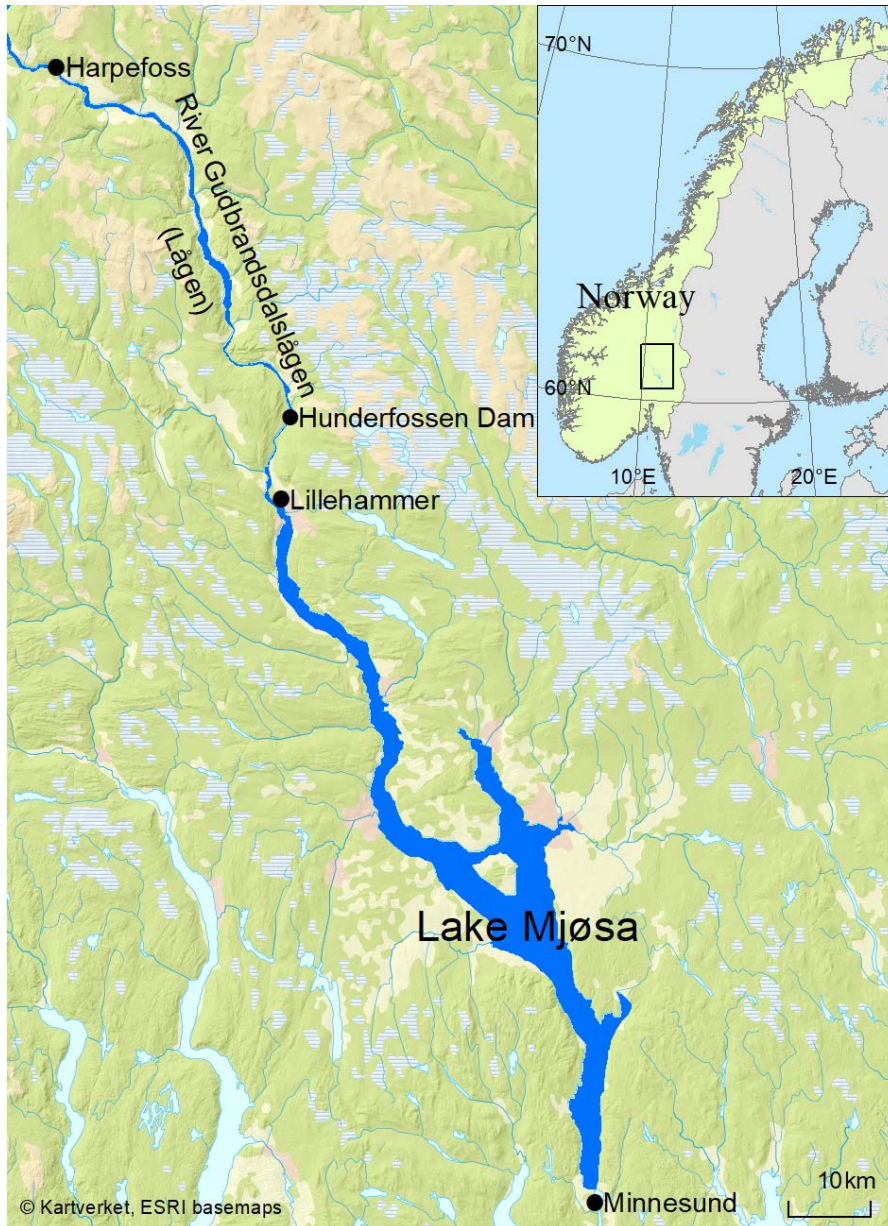

**Figure 2.** Map of Lake Mjøsa and the river Gudbrandsdalslågen, where the Hunder brown trout occurs. The fish ladder and the hatchery are located at the Hunderfossen dam. Sources: The Norwegian Mapping Authority (<https://www.kartverket.no>) and ESRI (<https://www.esri.com>). After Aass et al. (2017).

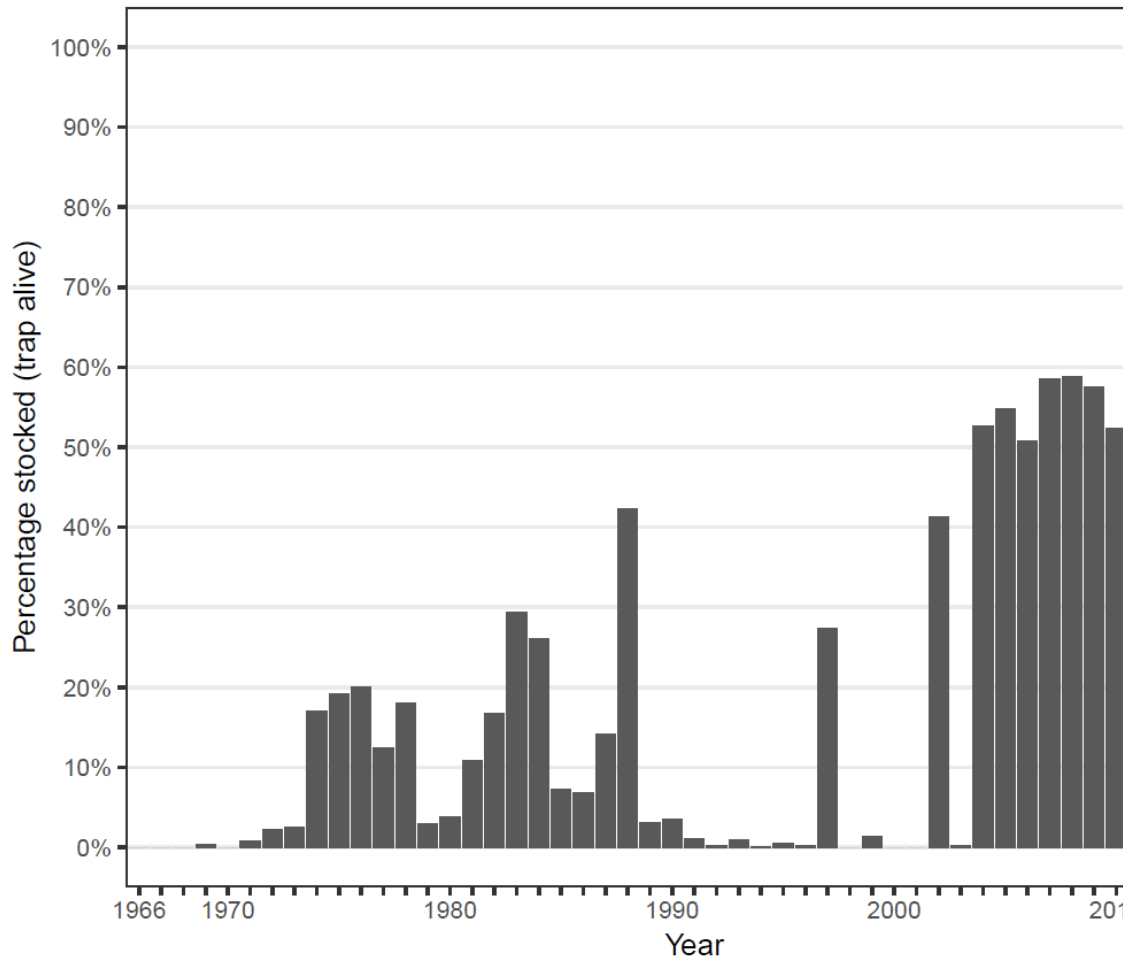

**Figure 3.** Percentage of stocked (as opposed to wild-born) individuals captured alive in the fish ladder trap over time (capture type = “trap alive”). The count is based on captures contained in the SUSTAIN trout survival dataset only.

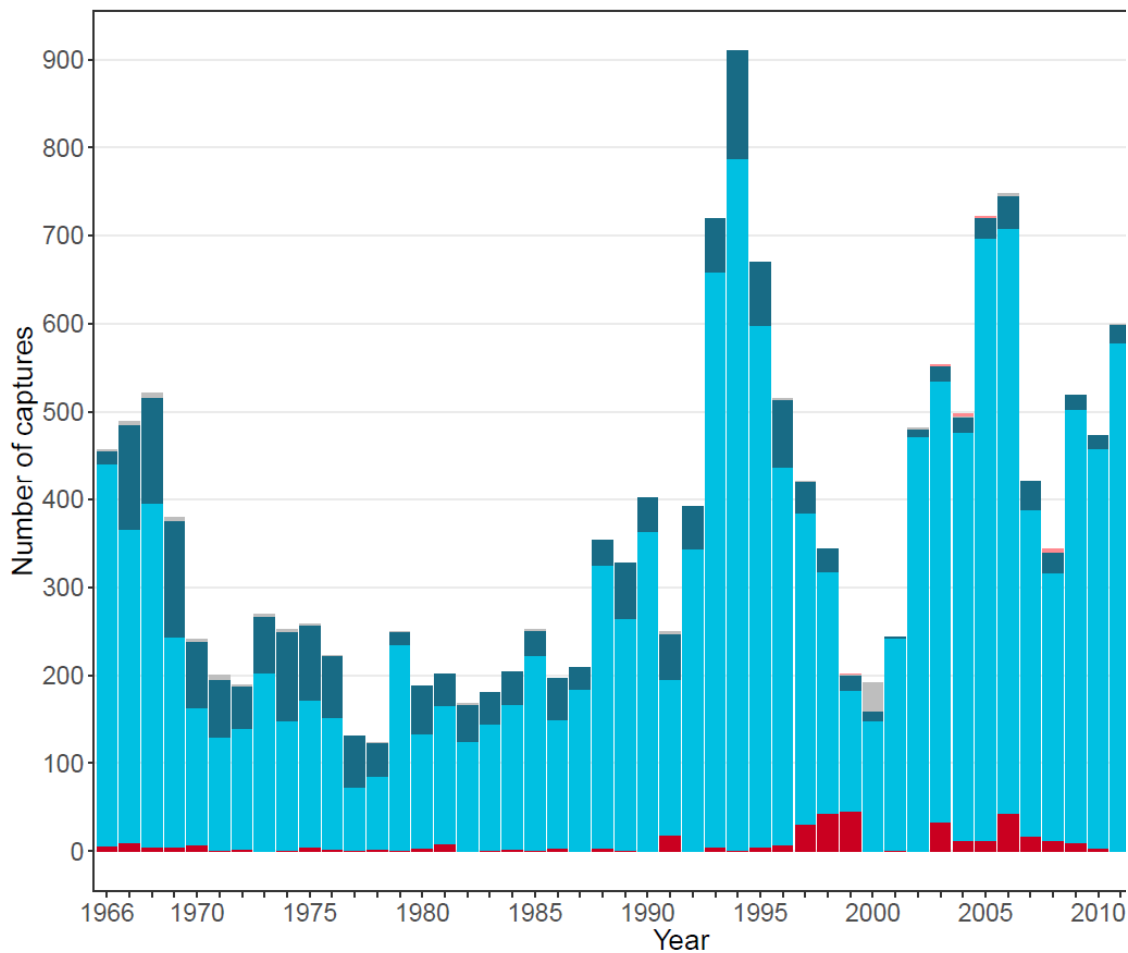

**Figure 4.** Count of trout captures per year in the SUSTAIN trout survival dataset, categorised by capture type. The capture types "trap dead" and "trap alive " are found in the fish ladder trap; "harvest" are captured alive elsewhere by fishers and killed; "catch release" are captured elsewhere by fishers and released alive, "found dead" are found dead anywhere else than the trap.

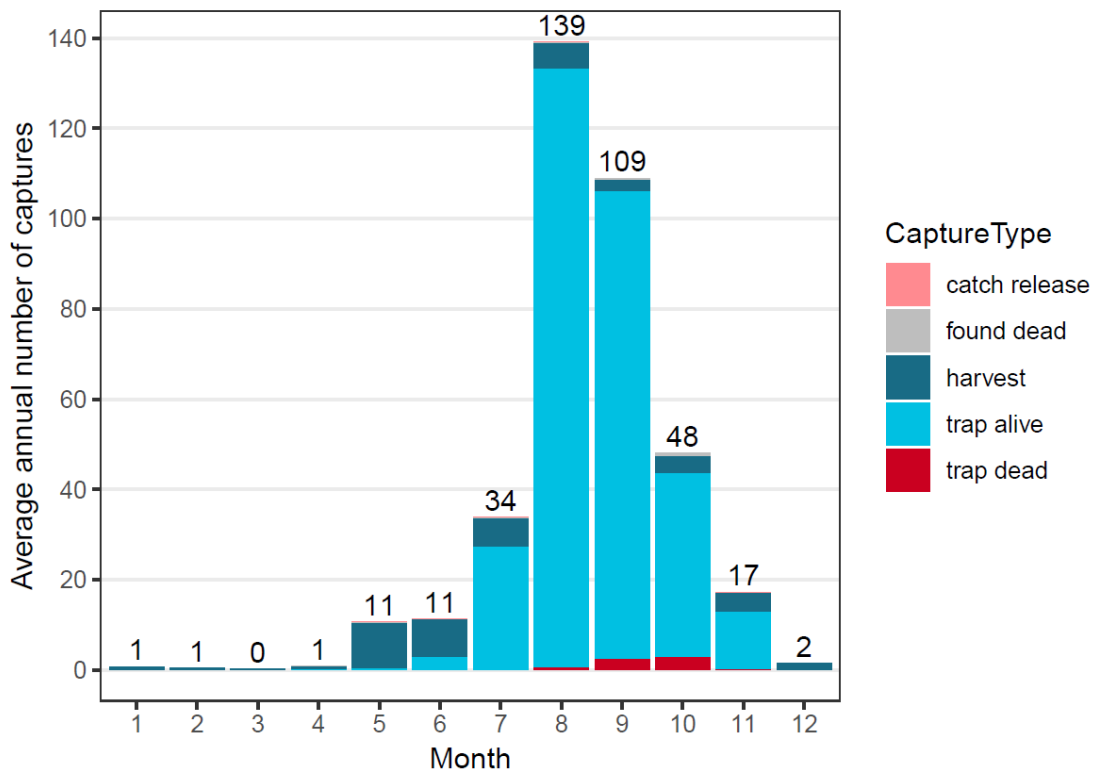

**Figure 5.** Average number of trout captures per month for the period 1966-2016, categorised by capture type. Digits above bars represent average numbers of all captures (all capture types combined) per month. For more details, see Fig. 5.

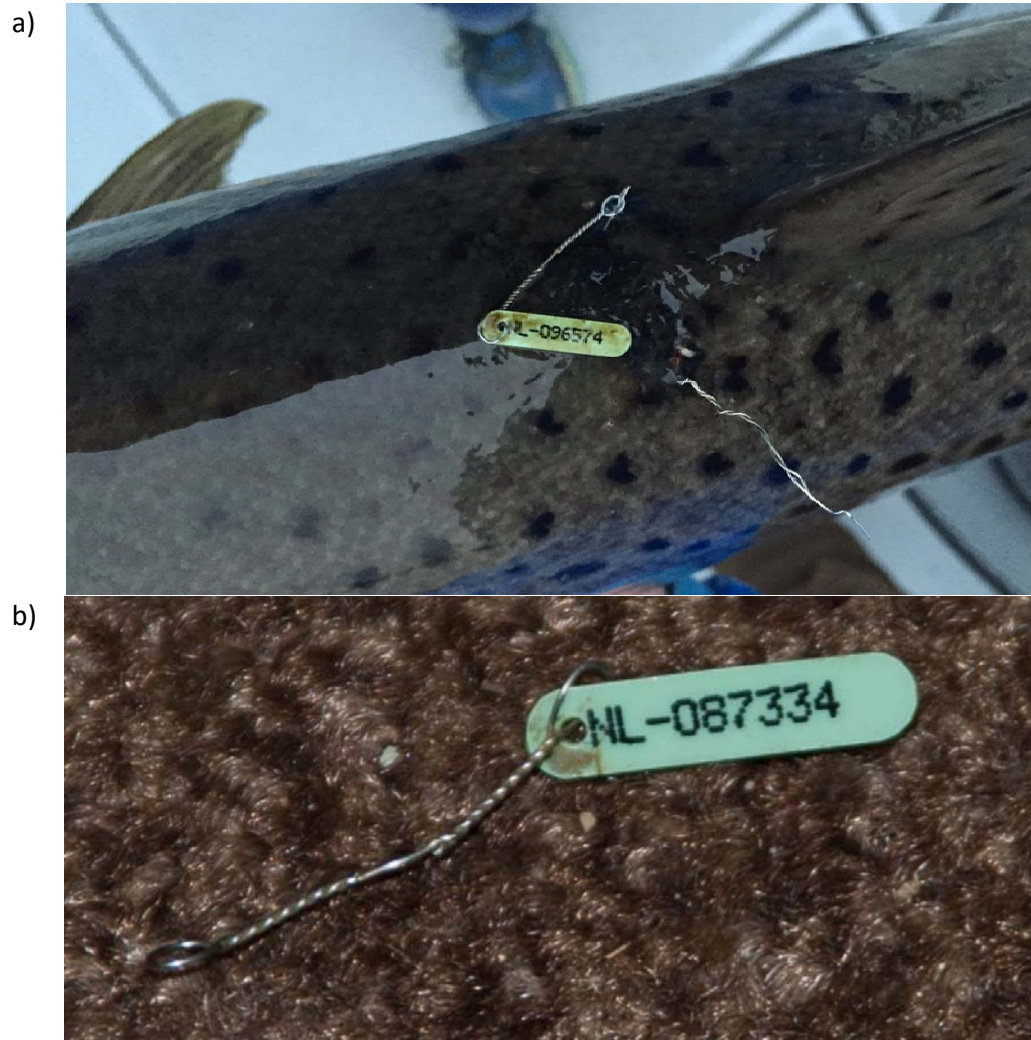

**Figure 6.** (a) Example of fish tagged with a Carlin tag. (b) Detail of a Carlin tag with individual code.

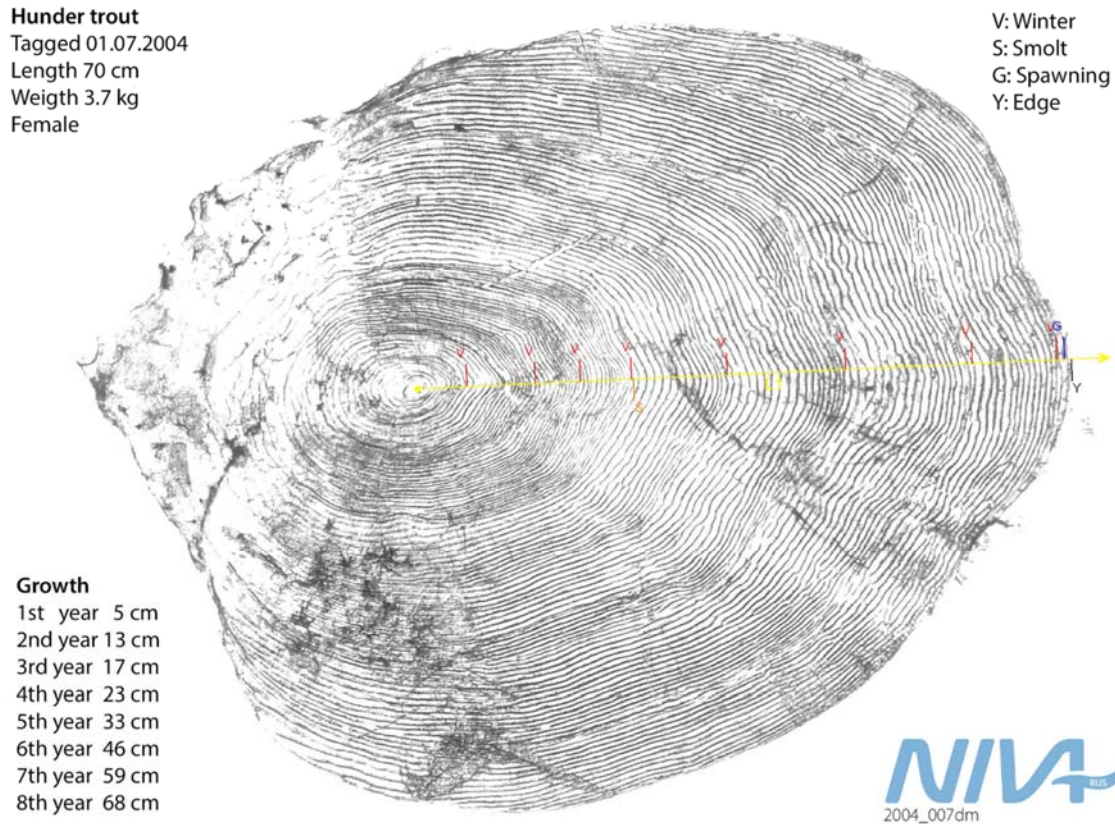

**Figure 7.** Illustration of a fish scale and interpretation of growth and spawning events. The yellow line represents the time line from hatching (centre) to the current age (the edge). Red lines indicate winters (marked "V"), where the growth is slower (denser growth curves). Smoltification ("S") after the 4th winter is indicated by subsequent rapid growth. Spawning ("G") is followed by very slow growth.

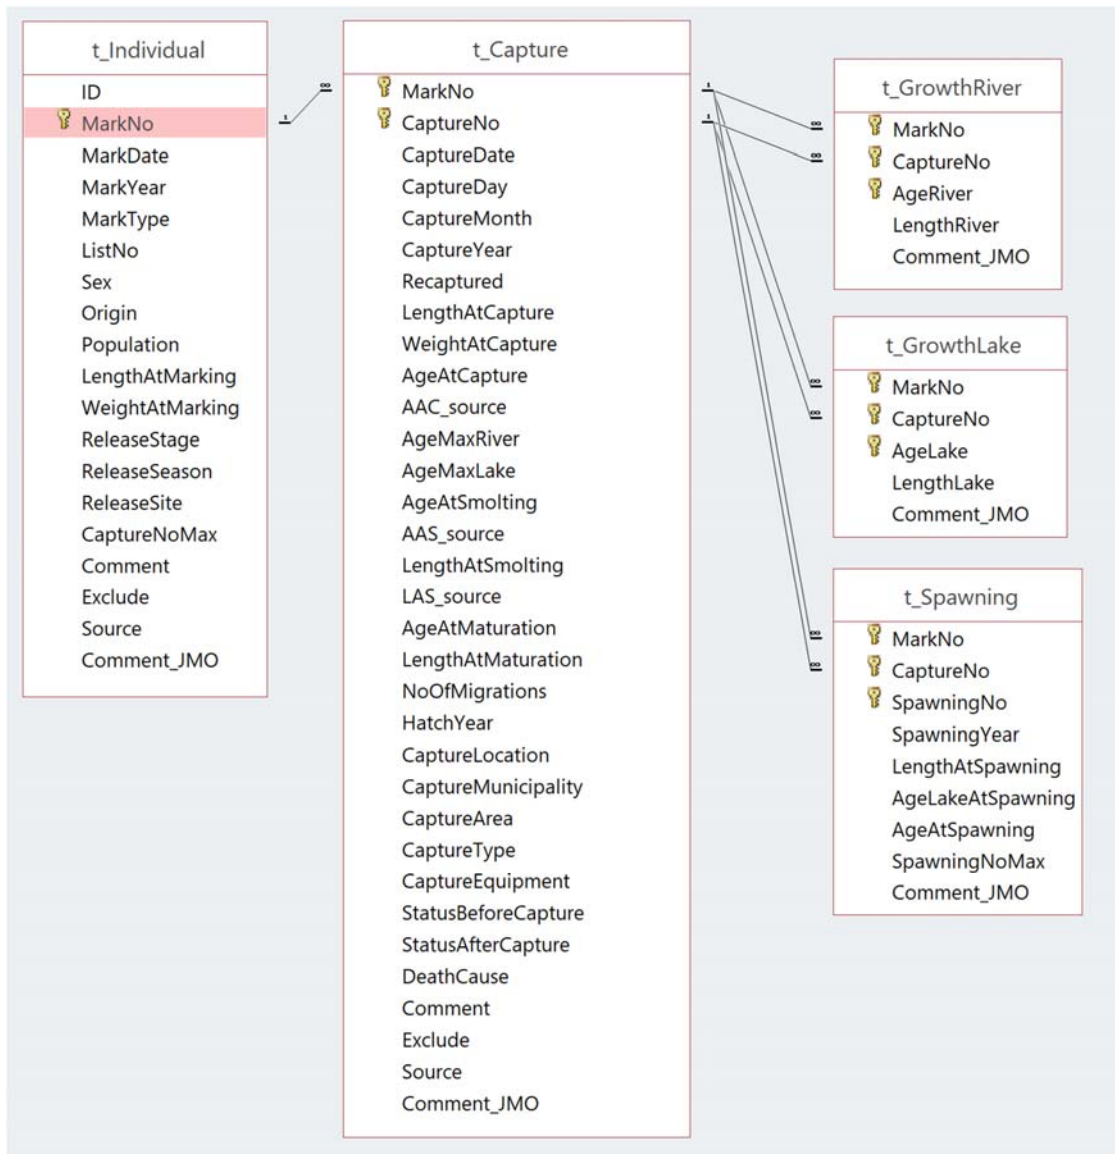

**Figure 8.** Illustration of the data model for the relational SUSTAIN trout database. The connecting lines illustrate one-to-many relationship from t\_Individual to t\_Capture, and from t\_Capture to the three tables t\_GrowthRiver, t\_GrowthLake and t\_Spawning. The key symbol illustrates the single or composite key field(s) identifying the unique records of each table.



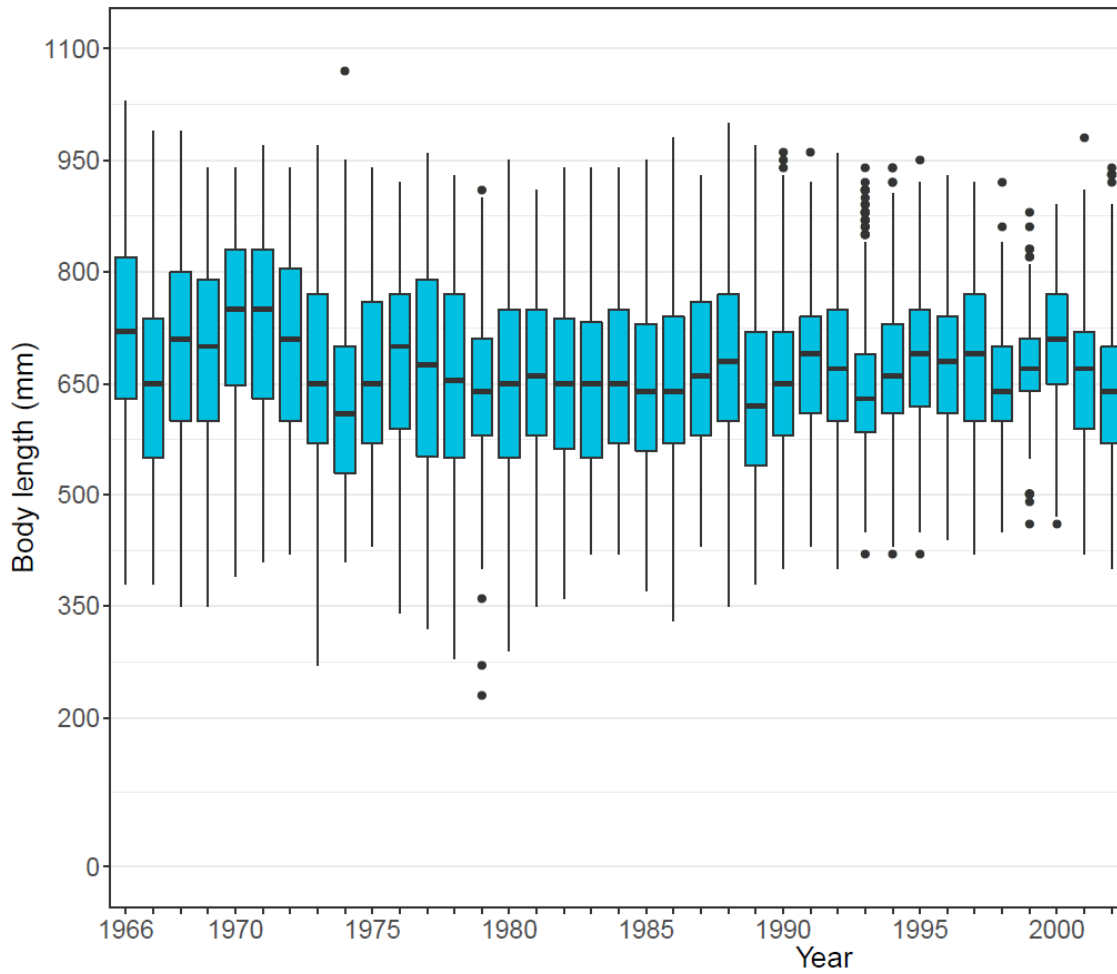

**Figure 9.** Distributions of individual body lengths per year in the SUSTAIN trout survival dataset. The box plot shows the median (horizontal bar), 25% and 75% quantiles (range of the box), largest and smallest values within 1.5 times the interquartile range (whiskers = vertical lines) and outliers (dots beyond whiskers). Note the decreasing trend in variation over the years (shorter vertical bars towards the end of the time series).

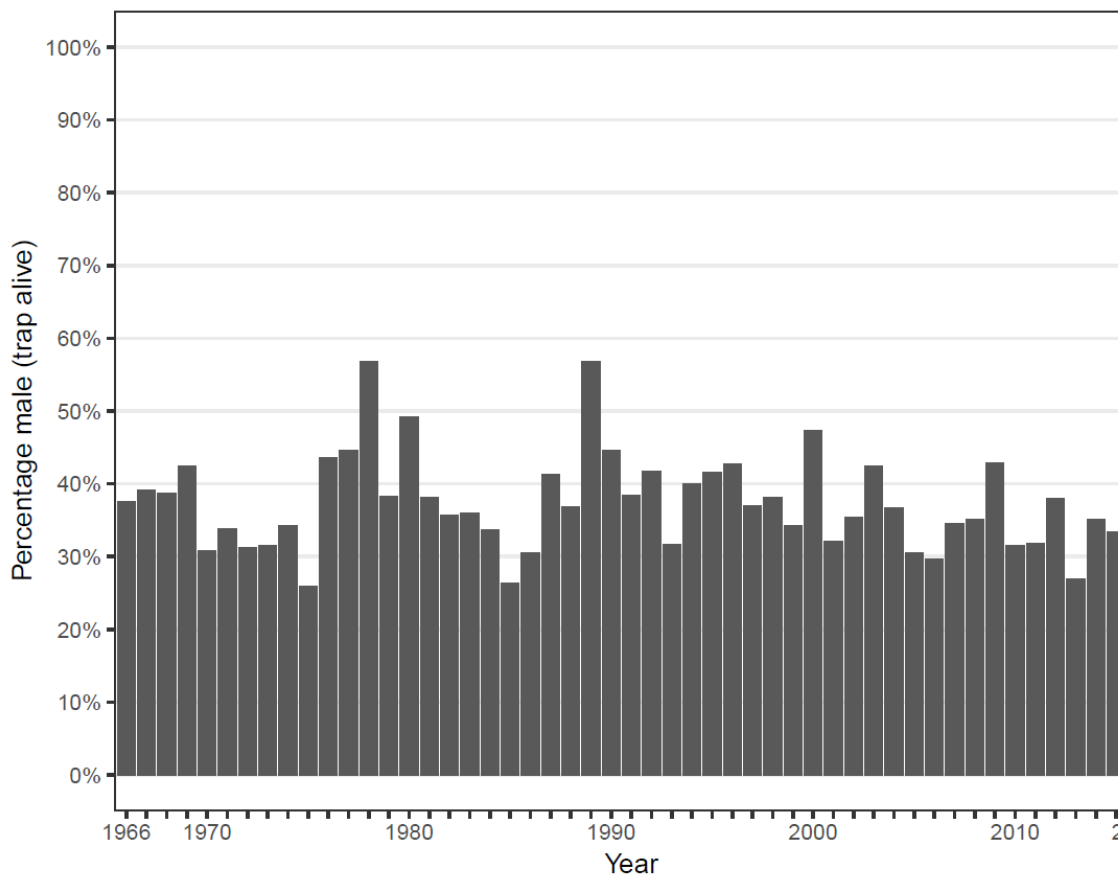

**Figure 10.** Percentage of male (relative to female) individuals captured alive in the fish ladder trap over time (capture type = “trap alive”). The count is based on captures contained in the SUSTAIN trout survival dataset only.
